1  
2  
3  
4  
5  
6  
7  
8  
9  
10  
11  
12  
13  
14  
15  
16  
17  
18  
19  
20  
21  
22  
23  
24

# Too much is too much: influence of former stress levels on food craving and weight gain during the COVID-19 period

\*Rachel Granger <sup>1,2</sup>, Hans P. Kubis, <sup>2</sup>

1. Centre for Health Economics and Medicines Evaluation, School of Medical and Health Sciences, Bangor University, UK.

2. School of Human and Behavioural Sciences, College of Human Sciences, Bangor University, UK

\*Corresponding author

E-mail [rachel.granger@bangor.ac.uk](mailto:rachel.granger@bangor.ac.uk) (RG)

NOTE: This preprint reports new research that has not been certified by peer review and should not be used to guide clinical practice.

## 25 **Abstract**

26           The COVID-19 pandemic and associated social restrictions had an extensive effect on  
27 peoples' lives. Increased rates of weight gain were widely reported, as were declines in the general  
28 populations' mental health, including increases in perceived stress. This study investigated whether  
29 higher perceived levels of stress during the pandemic were associated with greater levels of weight  
30 gain, and whether poor prior levels of mental health were a factor in higher levels of both stress and  
31 weight gain during the pandemic. Underlying changes in eating behaviours and dietary consumption  
32 were also investigated. During January-February 2021, UK adults (n=179) completed a self-report  
33 online questionnaire to measure perceived levels of stress and changes (current versus pre-COVID-  
34 19 restrictions) in weight, eating behaviours, dietary consumption, and physical activity. Participants  
35 also reported on how COVID-19 had impacted their lives and their level of mental health prior to the  
36 pandemic. Participants with higher levels of stress were significantly more likely to report weight  
37 gain and twice as likely to report increased food cravings and comfort food consumption (OR=2.3  
38 and 1.9-2.5, respectively). Participants reporting an increase in food cravings were 6-11 times more  
39 likely to snack and to have increased consumption of high sugar or processed foods (OR=6.3, 11.2  
40 and 6.3, respectively). Females reported a far greater number of COVID-19 enforced lifestyle changes  
41 and both female gender and having poor mental health prior to the pandemic were significant  
42 predictors of higher stress and weight gain during the pandemic. Although COVID-19 and the  
43 pandemic restrictions were unprecedented, this study suggests that understanding and addressing the  
44 disparity of higher perceived stress in females and individuals' previous levels of mental health, as  
45 well as the key role of food cravings, is key for successfully addressing the continuing societal issue  
46 of weight gain and obesity.

47

48 **Key words:** Stress, weight gain, eating behaviours, food cravings, COVID-19

49

## 50 **Introduction**

51           After the declaration of the SARS-CoV-2 coronavirus (COVID-19) pandemic in March 2020  
52 [1], restrictions were put in place in many countries around the world, to help curb the spread of the  
53 virus [2]. This included the government-imposed restrictions that came into place in the UK on 23rd  
54 March 2020 [3]. These initial COVID-19 restrictions caused sudden and radical changes in habits and  
55 lifestyles, including self-isolation for individuals more vulnerable to the virus, physical distancing,  
56 transfer to home-based working and education, closure of indoor community spaces and sports  
57 facilities, use of personal protective equipment (PPE) in work, and job furlough in many sectors [4].  
58 The subsequent lockdowns in Autumn 2020 and Winter 2020-21 (timings varied between countries  
59 in the UK) had a significant impact on the UK population [4].

60           Although COVID-19 restrictions were implemented to improve the health outcome of the  
61 pandemic, the high level of hospitalisations and deaths in the UK [5] caused concern both over  
62 personal health and the health of loved ones [6]. These concerns, combined with financial insecurity,  
63 due to increased job uncertainty and losses [7], and reduced social interactions were linked to a  
64 considerable increase on the levels of psychological stress reported by general populations in the UK  
65 [6,8] and around the world [9-12].

66           Since the start of the pandemic there was also an overall reported increase in food intake and  
67 weight gain both in the UK and other countries [13-18]. Studies in the first few months of the  
68 pandemic reported weight gains in 22-50% of general adult populations [15-18], with follow up  
69 studies reporting a substantial subset of people who maintained or reported further weight gain  
70 [17,19]. These increases in weight gain were associated with specific dietary behaviours, including  
71 increased snacking [14] and greater consumption of processed foods including high sugar and high  
72 fat/energy foods [20-22]. This increased weight gain was also often associated with increased levels  
73 of food cravings or reductions in food craving control [17,19,20,22,23].

74 Prior to COVID-19, obesity was already considered to be a global epidemic [24-26]. In  
75 addition, people with obesity are likely to suffer more serious health consequences from COVID-19  
76 infection [27-28]. Obesity is a complex multifactorial condition, who's development is strongly  
77 influenced by genetic and behavioural factors, but also by wider socioeconomic and environmental  
78 influences of health, which are often linked to higher levels of stress [29]. The level of stress  
79 experienced by an individual will often be greater when there is a high perceived level of uncertainty,  
80 unpredictability, lack of information and lack of control [30]; all factors that were present during the  
81 COVID-19 pandemic.

82 Prior to the pandemic, long-term chronic stress already had a significant positive association  
83 with weight gain [31-34]. Several studies during the pandemic have already reported a link between  
84 increased stress and: weight gain [17,19,20,22], changes in eating behaviours [35] or changes in  
85 dietary consumption [36].

86 Food cravings are defined an intense desire to consume a particular food or food type, often  
87 in the absence of hunger [37]. Higher levels of food cravings are associated with individuals who  
88 have higher BMI/obesity [38] or disordered eating patterns, such as bulimia [20,39]. Higher levels of  
89 food cravings or loss of craving control have also been linked to reduced weight loss and early drop-  
90 out rates in dietary interventions [39]. Food cravings are generally associated with foods that are high  
91 in sugar, fat/energy and are often highly processed [20,23,40]. These foods are also often referred  
92 to as comfort foods, as their consumption in excessive amounts is associated with an attempt to sooth  
93 emotional upset due to stress, anxiety, depression, loneliness, or anger [41,42].

94 Often, with current dietary approaches, increased food cravings and excessive comfort eating,  
95 which both increase energy intake, have been viewed as drivers of weight gain. [43]. However, some  
96 of the main barriers to weight loss and weight maintenance that have been identified in recent studies  
97 are mental distress and binge eating (or comfort eating) [44], negative thoughts or moods [45] and  
98 traumatic life events [46]. Recent reviews on the role of stress in weight gain has suggested that rather

99 than being viewed as primarily drivers of weight gain, cravings and comfort eating should be  
100 considered as mediators of the effect of stress on dietary intake and weight gain [24,32].

101 The aim of this study was to investigate whether higher levels of stress reported by the general  
102 UK population during the pandemic were linked to higher levels of weight gain, and whether these  
103 changes were directly associated with increased food cravings and comfort eating. Secondly, we  
104 aimed to investigate whether individuals' level of mental health prior to the pandemic were linked to  
105 higher levels of stress and weight gain during the pandemic. In addition, we addressed whether  
106 specific lifestyle changes caused by COVID-19 and the UK imposed restrictions were linked to higher  
107 levels of stress. We hypothesized that individuals with higher perceived stress would report greater  
108 weight gain during the pandemic, with people who had poor mental health before COVID showing  
109 the strongest effects. Furthermore, we hypothesized that the weight gain and perceived stress were  
110 strongly linked with increased food cravings and comfort food consumption.

111

112

## 113 **Materials and Methods**

### 114 **Participants**

115 The study used a convenience sample and the eligibility criteria of participants age 18 or over  
116 and resident in the UK since the beginning of COVID-19 restrictions in March 2020. Participants  
117 were recruited through open adverts on social media and through internal advertising in Bangor  
118 University School of Human and Behavioural Sciences. To achieve adequate power for testing a  
119 minimum of 92 participants were required, based on a two tailed priori power analysis of 25% effect  
120 size, 0.8 power, 0.05 error (calculated using GPower Software). Effect size used was based on  
121 previously reported increases in food intake and weight gain when under high levels of stress, both  
122 prior to and during COVID-19 restrictions [15,17]. The study protocol was performed in accordance

123 with the declaration of Helsinki and was approved by Bangor University School of Human and  
124 Behavioural Sciences Ethics Committee (ethics approval number M08-17/18).

125

## 126 **Measurements**

127 Data was collected using a bespoke online survey that was administered via Qualtrics (Qualtrics  
128 Software Company Provo, UT, USA). The survey was completed anonymously, with no data  
129 collected that could identify participants. The survey was designed to be easy to answer and  
130 completed in as short a time as possible, to ensure minimal drop out of participants. To enable this,  
131 where appropriate, questions were asked about categorical changes (i.e., increased, stayed the same  
132 or reduced) rather than absolute measures. As well as simplifying the questionnaire, the use of  
133 categorical measures, rather than absolute measures, enabled the reporting of overall trends while  
134 avoiding inaccuracy problems with self-report measures. After providing informed consent,  
135 eligible participants reported on the following information:

136

## 137 **Demographics and Weight Change**

138 Participants reported on the demographic measures on age, gender, main current occupation, country  
139 of the UK based , height and weight (with BMI being calculated by the researcher). Participants were  
140 asked to report how their weight had changed since the beginning of the COVID-19 restrictions  
141 within the following categories: lost more than 3kg/6 pounds, lost up to 3kg/6 pounds; weight  
142 remained stable, gained up to 3kg/6 pounds, gained between 3kg/6 pounds and 6kg/a stone, gained  
143 more than 6kg/a stone.

144

## 145 **Eating Behaviours**

146 Participants were asked to report whether their general hunger, food cravings, number of meals  
147 consumed, snacking in the daytime and snacking in the evening had decreased, increased or stayed

148 the same in the past 3 months, compared to prior to COVID-19 restrictions. Participants also reported  
149 if they believed any of the following reasons had increased their dietary consumption: being at home,  
150 boredom, stress anxiety or low moods, feeling tired or lacking in energy, The behaviour categories  
151 were based on categories reported by other COVID-19 studies [20,47].

152

### 153 **Dietary Consumption**

154 Participants were asked to report if their consumption of any of the following categories had  
155 decreased, increased or remained the same in the past 3 months, compared to before the start of the  
156 COVID-19 restrictions: fruit and veg; high fibre foods (such as wholemeal food, wholegrains and  
157 beans), red or processed meat (including bacon, ham, sausages; white meat (including fish), dairy  
158 products, vegetarian/vegan meat or dairy alternatives, processed foods (including ready meals or  
159 takeaways), home cooked food, tinned or frozen food; high sugar foods (such as cakes, biscuits,  
160 chocolates and sweets; high fat foods (such as savoury snacks, crisps or nuts), coffee or tea, fruit  
161 juices or smoothies, fizzy drinks (including diet drinks), alcohol, water. The range of dietary  
162 categories was based on dietary categories reported in other COVID-19 studies [15-17].

163

### 164 **Physical Activity**

165 To ensure that any reported changes in weight were due to changes in dietary consumption rather  
166 than changes in physical activity, participants were asked if their level of vigorous/moderate  
167 exercise, walking and sedentary time had decreased, increased or stayed the same in the past 3-  
168 months compared to before COVID-19 restrictions.

169

### 170 **Stress**

171 As part of the survey participants completed the Perceived Stress Scale PSS-10 [48] to evaluate  
172 general levels of stress (Cronbach's  $\alpha = 0.87$ , for this study). In addition, participants also reported

173 whether prior to COVID restrictions they: had occasional stresses but generally could cope well, had  
174 some level of stress anxiety or low mood but not diagnosed, had previously been diagnosed with  
175 stress anxiety or depression, or preferred not to say.

176

## 177 **Impact of COVID-19 on Lifestyle**

178 Participants were asked to report on ways in which ways COVID-19 and the associated imposed  
179 restrictions had impacted their lifestyle and food availability. Participants were asked if the  
180 restrictions had impacted them in any of the following ways: continued to work outside the home but  
181 had to use personal protective equipment (PPE), moved to working from home, experienced job  
182 uncertainly, experienced job loss, had confirmed COVID-19 infection, had to self- isolate due to  
183 possible COVID-19 infection, had to self-isolate due to underlying health issues, had additional  
184 caring responsibilities including school-aged children or other dependents, had less access to fresh or  
185 healthy food, had less money to spend on food, had less time to prepare healthy food.

186

## 187 **Data Analysis**

188 Descriptive statistics (mean  $\pm$ SD) were used to characterise survey respondents and summarise  
189 their changes in weight gain, eating behaviours, dietary consumption and physical activity. Eating  
190 behaviours and dietary consumption were re-categorised in to an “increased” or “no increase”  
191 categories (which included the “stayed the same” and “decreased” categories). This was as this study  
192 was specifically interested in the likelihood of increased food cravings and comfort foods being linked  
193 to stress and weight gain.

194 Although the PSS-10 questionnaire gives a continuous score outcome, to enable us to carry out  
195 logistic analysis with the categorical variables reported for changes in weight, dietary consumption  
196 and exercise, participants were recategorized into a higher or lower stress group, with categorization  
197 based on the mean PSS-10 score of trial participants ( $19.3 \pm 6.9$ ). Participants with a PSS score of 19.3



198 or lower were allocated to the lower stress category and participants with a PSS score of 19.4 or  
199 higher were allocated to the higher stress category.

200 Ordinal regression analyses were used to identify factors linked to a greater likelihood of reporting  
201 weight gain. Pearson's chi-square analyses were used to investigate a significant difference in  
202 likelihood in response between the higher and lower stress groups to: weight gain, increases in eating  
203 behaviours, increases in dietary consumption, and changes in physical activity. Binary regression  
204 analysis was used to identify factors linked to a greater likelihood of belonging to the higher stress  
205 group. Odds ratios were also calculated for all chi-square analyses, to allow direct comparison of  
206 results with the binary and ordinal regression analyses. All statistical analyses were carried out using  
207 the Statistical Package for Social Sciences (IBM SPSS Statistics for Windows V.27.0. Armonk,  
208 USA). A 95% confidence interval (95% CI) was selected, and a significance level of  $p < 0.05$  was  
209 applied to all statistical analyses.

210

## 211 **Results**

### 212 **Descriptive Statistics Including Impact of COVID-19 restrictions**

213 In total, responses were collected from 220 participants between 6th January until 2nd  
214 February 2021. After removing duplicates and incomplete questionnaires, 179 participants' data sets  
215 remained. There was no significant demographic difference between survey completers and non-  
216 completers.

217 Most survey respondents were female (75%) and aged between 18-55 (85%). Two thirds of  
218 respondents were based in Wales (66%) and a third (34%) in England. The mean BMI of respondents  
219 was 26.10( $\pm$ 5.46) kg/m<sup>2</sup>.

220 Many respondents reported that their main current occupation involved working from home,  
221 with a higher proportion of females being based at home (F=40%:M=27%) and more male  
222 respondents continuing to work outside the home (F=15%:M=27%). As the questionnaire was

223 advertised within the university, unsurprisingly students made up 25% of respondents, although 8%  
224 of responders were in the retired category. Notably, only females reported that caring for children or  
225 dependents was their main occupation (5%). The overall level of participants unemployed or  
226 furloughed was low (3% and 1%, respectively).

227         When asked about the impact of COVID-19 restrictions on their lifestyle, a comparable  
228 number of women and men reported moving to working from home (F=50%: M=46%). A higher  
229 proportion of women reported worked outside the home using PPE (F=35%:M=25%), having to  
230 isolate due to potential COVID-19 infection (F=25%:M=16%) or having additional caring  
231 responsibilities for children or other dependents (F=39%:M=9%). Males reported higher levels of job  
232 uncertainty (F=12%:M=23%), job loss (F=5%:M=7%), having had COVID-19 (F=4%:M=7%) and  
233 self-isolating due to underlying health issues (F=4%:M=11%). The difference in the level of impact  
234 of COVID-19 restrictions by gender was notable. When comparing the total number of changes that  
235 participants were affected by, 53% of females were affected by 2 or more lifestyle changes compared  
236 to 39% of males. The impact of COVID-19 restrictions on food availability was also far more likely  
237 to impact females. Females were around twice as likely to report less money to spend on food  
238 (F=16%:M=9%), less access to healthy food (F=12%:M=7%) or less time to cook healthy food  
239 (F=11%:M=5%). Full demographic statistics for survey participants are available in S1 Table.

240

## 241 **Stress and Weight Gain**

242         Participants were asked to report their weight change in categories rather than absolute weight  
243 changes to avoid inaccuracies with self-report measures. There was a notable difference  
244 between the genders for reported weight gain, with females almost twice as likely as males to report  
245 an overall weight gain since the start of the COVID-19 restrictions (F=50%: M=27%). and twice as  
246 likely to report the highest level of weight gain of more than 6kg (F=10%: M=5%). see Table 1 for  
247 all reported weight changes.

248 **Table 1. Changes in weight reported since the start of COVID-19 Restrictions**

| Weight change            | Female<br>n= (%) | Male<br>n= (%) | Total<br>n= (%) |
|--------------------------|------------------|----------------|-----------------|
| Gained more than 6kg     | 13 (9.6%)        | 2 (4.5%)       | 15 (8.4%)       |
| Gained 3-6kg             | 17 (12.6%)       | 3 (6.8%)       | 20 (11.2%)      |
| Gained up to 3kg         | 37 (27.4%)       | 7 (15.9%)      | 44 (24.6%)      |
| Weight remained the same | 40 (29.6%)       | 24 (54.5%)     | 64 (35.8%)      |
| Lost up to 3kg           | 12 (8.9%)        | 1 (2.3%)       | 13 (7.3%)       |
| Lost more than 3kg       | 16 (11.9%)       | 7 (15.9%)      | 23 (12.8%)      |

249

250 Ordinal regression analysis showed that the likelihood of the higher stress group reporting a  
 251 greater level of weight gain was statistically significant, with a medium effect size,  $\chi^2(5, n=179)$   
 252  $=14.639, p=0.012, phi=0.286$ ). This confirmed the study's main hypothesis that participants reporting  
 253 a higher level of stress during the pandemic were statistically more likely to report a higher level of  
 254 weight gain. Although the aim this study was not specifically focus on gender differences, due to the  
 255 large differences in weight changes reported by males and females a Chi-square tests for  
 256 independence was carried out, which showed that the association between gender and weight gain  
 257 was statistically significant, with small to medium effect,  $\chi^2(2, n=179) = 11.986, p=0.035, phi=0.259$ .

258

## 259 **Stress, Eating Behaviours and Weight Gain**

260 In the survey, participants were asked to report on changes in eating behaviours that are often  
 261 linked to weight gain, including hunger, number of meals, cravings, and snacking. Overall increases  
 262 were reported for all eating behaviour categories, apart from number of meals (see Table 2). Although  
 263 most respondents (53%) reported that their levels of general hunger had remained at pre-COVID-19  
 264 levels, over half of respondents reported that their food cravings, snacking in the day and snacking in  
 265 the evening had increased (52%, 53% and 53%, respectively). Half of respondents also reported that  
 266 the reason they had eaten more was due to being at home or boredom (52% and 48%, respectively),  
 267 with 41% reporting eating more due to stress, anxiety or low mood (see Table 3).

268 **Table 2. Changes in Reported Levels of Dietary Behaviours**

| <b>Eating habits</b>           | <b>Decreased<br/>n= (%)</b> | <b>Stayed the<br/>same<br/>n= (%)</b> | <b>Increased<br/>n= (%)</b> |
|--------------------------------|-----------------------------|---------------------------------------|-----------------------------|
| <b>Eating Behaviours</b>       |                             |                                       |                             |
| <b>General hunger</b>          | 27 (15.2%)                  | 94 (52.8%)                            | 57 (32.0%)                  |
| <b>Food cravings</b>           | 18 (10.2%)                  | 66 (37.5%)                            | 92 (52.3%)                  |
| <b>Number of meals</b>         | 24 (13.5%)                  | 131 (73.6%)                           | 23 (12.9%)                  |
| <b>Snacking in the day</b>     | 31 (17.4%)                  | 52 (29.2%)                            | 95 (53.4%)                  |
| <b>Snacking in the evening</b> | 21 (12.1%)                  | 61 (35.1%)                            | 92 (52.9%)                  |

269

270 **Table 3: Reasons Given for Increased Food Consumption**

| <b>Reasons for changes</b>         | <b>Yes<br/>n= (%)</b> | <b>No<br/>n= (%)</b> |
|------------------------------------|-----------------------|----------------------|
| <b>Being at home</b>               | 93 (52.0%)            | 86 (48.0%)           |
| <b>Boredom</b>                     | 85 (47.5%)            | 94 (52.5%)           |
| <b>Stress, anxiety or low mood</b> | 75 (41.9%)            | 104 (58.1%)          |
| <b>Tired or lacking in energy</b>  | 53 (29.6%)            | 126 (70.4%)          |

271

272

273

274

275

276

277

278

279

280

281

282

283

284

285

286

287

288

An ordinal logistic analysis was performed to assess whether increases in the 5 eating behaviours and 4 reasons given for increased eating increased the likelihood of respondents reporting weight gain. The full model was statistically significant,  $\chi^2(9, n=179) = 70.877, p < 0.001$ , with increased food cravings ( $p=0.002, OR=3.225$ ), increased number of meals ( $p=0.012, OR=2.978$ ), increased snacking in the day ( $p=0.012, OR=2.568$ ) and eating due to stress, anxiety or low mood ( $p=0.026, OR=2.192$ ) all significant factors linked to weight gain. Although being at home or boredom were given by the participants for the primary reasons for increased food consumption, there was no statistical significance of these factors and actual weight gain. Table 4 shows all coefficients in the ordinal logistic model.

289 **Table 4: Coefficients of the predictive model for Weight Gain**

| Variables Entered                    | B     | SE    | OR     | 95% CI for Exp(B) |       |
|--------------------------------------|-------|-------|--------|-------------------|-------|
|                                      |       |       |        | LL                | UL    |
| Increase in General Hunger           | -.183 | .3464 | .833   | .423              | 1.643 |
| Increase in Food Cravings            | 1.171 | .3783 | 3.225* | 1.536             | 6.768 |
| Increase in Number of Meals          | 1.091 | .4337 | 2.978* | 1.273             | 6.967 |
| Increases in Snacking in the Day     | .943  | .3766 | 2.568* | 1.227             | 5.372 |
| Increases in Snacking in the Evening | .520  | .3326 | 1.682  | .876              | 3.228 |
| Ate more due to being at home        | -.119 | .3738 | .888   | .427              | 1.848 |
| Ate more due to boredom              | -.352 | .3327 | .703   | .366              | 1.350 |
| Ate more due to stress               | .785  | .3535 | 2.192* | 1.096             | 4.382 |
| Ate more due to low energy           | .339  | .3479 | 1.403  | .709              | 2.775 |

290

291 \*= $p < 0.05$ ; \*\*= $p < 0.001$ .  $n=179$ .  $SE$ =standard error of B.  $OR$ = odds ratio.  $LL$ = lower limit;  $UL$ =upper  
292 limit

293 To determine whether these behaviours were more likely in the higher stress group a chi-  
294 square test was carried out. This showed that participants who were in the higher stress category were  
295 twice as likely to report increased food cravings  $\chi^2 (1, n=179) = 6.402, p=0.011, phi=0.202$ ;)  $OR=2.3$   
296 and snacking in the day  $\chi^2 (1, n=179) = 4.192, p=0.041, phi=0.165$ ),  $OR=1.9$ . Participants in the higher  
297 stress category were also more likely to report increased eating due to stress, anxiety or low mood  $\chi^2$   
298  $(1, n=179) = 25.684, p < 0.001, phi=0.390$ ), which is as expected, as both measures are reporting on  
299 levels of stress. In comparison, there was no statistical significance for higher stress and increased  
300 number of meals. In summary, increased food cravings and snacking in the day were the only  
301 behaviours correlated with both higher stress and weight gain.

302

### 303 **Stress, Dietary Consumption and Weight Gain**

304 Like changes in eating behaviours, there was a polarisation of changes dietary consumption.  
305 Over half of respondents maintained their pre-COVID-19 consumptions levels of fruit and veg (55%),  
306 high fibre (70%), red/processed meats (52%), white meat/fish (60%), dairy products (71%),  
307 vegetarian/vegan alternatives (62%) and tinned/frozen foods (68%). A notable change was seen with  
308 home cooked food category, where 50% increased their consumption. The other categories which  
309 showed the greatest change in consumption were those that can be categorised as comfort foods.

310 There was comparable split between decreased, increased or remained the same for processed foods  
 311 (36%, 29% and 30% respectively). 40% of participants reported an increase in consumption of high  
 312 fat/salt foods, and over half (57%) of participants reported an increase in high sugar foods. With the  
 313 drink categories, the majority respondents reported maintaining their pre-COVID-19 consumption  
 314 level of fruit juices/smoothies, fizzy drinks and water (59%, 54% and 58%, respectively). In  
 315 comparison almost half of respondents reported increased consumption of coffee and tea, and alcohol  
 316 (42% and 46%, respectively). A full summary of the dietary changes for survey participants is  
 317 available are available in S2 Table.

318 To determine which dietary categories were linked to weight gain an ordinal logistic  
 319 regression was carried out. The full model, containing all 16 food and drinks categories, was  
 320 statistically significant,  $\chi^2(16, n=179) = 75.291, p < 0.001$ , although only 4 of the 16 categories made  
 321 a significant contribution. Increased consumption of high sugar and processed foods were linked to a  
 322 2.5-3.2-times likelihood of an increase in weight gain ( $p=0.005, OR=3.2$  and  $p=0.032, OR=2.5$ ,  
 323 respectively). However, the inverse effect was seen in the categories of high fibre foods ( $p=0.034$ ,  
 324  $OR=0.4$ ) and water ( $p=0.033, OR=0.5$ ), where increased consumption was linked to a greater  
 325 likelihood of weight loss. Table 5 shows all coefficients in the ordinal logistic model.

326 **Table 5. Food and Drink Coefficients of the Predictive Model for Weight Gain**

| Category                                     | B      | Std. Error | OR     | Lower | Upper |
|----------------------------------------------|--------|------------|--------|-------|-------|
| Increase in Fruit and Veg                    | .445   | .3786      | 1.561  | .743  | 3.279 |
| Increase in Fibre                            | -1.048 | .4941      | .351*  | .133  | .923  |
| Increase in Red/processed meat               | -.318  | .3817      | .727   | .344  | 1.537 |
| Increase in white meat, fish and eggs        | -.637  | .3901      | .529   | .246  | 1.136 |
| Increase in dairy                            | .850   | .4590      | 2.339  | .951  | 5.751 |
| Increase in vegetarian and vegan             | -.639  | .3829      | .528   | .249  | 1.118 |
| Increase in processed/take aways/ready meals | .917   | .4274      | 2.501* | 1.082 | 5.780 |
| Increase in Home cooked                      | -.631  | .3431      | .532   | .272  | 1.043 |
| Increased in Tinned/Frozen                   | -.332  | .4978      | .717   | .270  | 1.903 |
| Increase in High Sugar foods                 | 1.147  | .4102      | 3.148* | 1.409 | 7.035 |
| Increase in high salt foods                  | .426   | .4200      | 1.531  | .672  | 3.487 |
| Increase in Coffee or Tea                    | .420   | .3256      | 1.521  | .804  | 2.880 |
| Increase in Juice/smoothies                  | .163   | .4800      | 1.177  | .460  | 3.016 |
| Increase in Fizzy drinks                     | .114   | .3647      | 1.120  | .548  | 2.290 |
| Increase in Alcohol                          | .534   | .3290      | 1.706  | .895  | 3.251 |

|                          |       |       |       |      |      |
|--------------------------|-------|-------|-------|------|------|
| <b>Increase in Water</b> | -.788 | .3695 | .455* | .220 | .938 |
|--------------------------|-------|-------|-------|------|------|

327 \*= $p < 0.05$ ; \*\*= $p < 0.001$ .  $n=179$ .  $SE$ =standard error of B.  $OR$ = odds ratio.  $LL$ = lower limit;  $UL$ =upper  
328 limit

329  
330 A chi-square analysis was carried out to determine whether the dietary categories linked to  
331 weight change were also linked to higher levels of stress. This showed that participants in the higher  
332 stress group were twice as likely to have increased their consumption of both high sugar foods  $\chi^2(1,$   
333  $n=179) = 4.001, p=0.045, \phi=0.161, OR=1.9$  and processed foods  $\chi^2(1, n=179) = 6.310, p=0.012,$   
334  $\phi=0.201, OR= 2.5$ . In comparison, there was no statistical significance for changes in the  
335 consumption of high fibre food or water and higher levels of stress. In summary, increases in high  
336 sugar and processed food consumption were the only dietary categories linked both to a higher level  
337 of stress and weight gain.

338

### 339 **Relationship between Food Cravings and Comfort Eating**

340 To investigate further the relationship between increased food cravings and increased comfort  
341 food consumption (which includes the high sugar, high fat/salt and processed food categories), a chi-  
342 square analysis was performed. We also investigated if an increase in food cravings was linked to  
343 an increase in snacking, as comfort food is often consumed outside mealtimes [49]. Participants who  
344 reported increased food cravings were over 11 times more likely to report increased consumption of  
345 high sugar foods  $\chi^2(1) = 48.008, p < 0.001, \phi = 0.534; OR = 11.2$ ), and over 6 times more likely to report  
346 increased consumption of processed foods,  $\chi^2(1) = 22.920, p < 0.001, \phi = 0.374, OR = 6.3$ ), although  
347 there was no significant link with high fat/salt foods. There was also a statistically significant link  
348 between increased cravings and increased snacking in the day (but not snacking in the evening), with  
349 participants reporting increased food cravings 6 times more likely to report an increase in snacking  
350 during the day,  $\chi^2(1) = 29.181, p < 0.001, \phi = 0.419; OR = 6.0$ ).

351

352



## 353 **Physical Activity and weight gain**

354 To discount the role of physical activity in the effect of stress on weight gain, participants  
355 were also asked to report in their changes in physical activity. Almost half of respondents (47%)  
356 reported a reduction in their level of moderate or strenuous activity compared to their pre-COVID-19  
357 levels of activity. In comparison, almost half (43%) of participants reported that they had increased  
358 their level of walking compared to pre-COVID-19 level. However, the category with the greatest  
359 reported difference, was sedentary behaviour, with 78% of respondents reporting an increase in  
360 sedentary compared to their pre-COVID-19 levels. Chi-squared tests for level of activity versus  
361 weight change did show a statistical significance for a reduction in moderate/strenuous activity and  
362 weight gain,  $\chi^2(2, n=179) = 25.354, p=0.005, \phi=0.271$ , but not for changes in level of walking or  
363 sedentary time. Chi-squared tests of level of activity versus stress levels were non-significant  $\chi^2(2,$   
364  $n=179) = 1.40, p=0.50, \phi=0.088$ ). Consequently, although a reduction of moderate/strenuous  
365 activity increased the likelihood of weight gain, it was not a mediator of the effect of stress on weight  
366 gain. A full summary of the physical activity changes for survey participants is available in S2Table.  
367 Figure 1 summarises all the significantly statistical findings reported, highlighting the correlation  
368 between higher stress, eating behaviours, dietary consumption and weight gain.

369

## 370 **Factors That Impacted Stress Levels During COVID-19**

371 Participants were asked to report both their current levels of perceived stress, using the PSS-  
372 10 questionnaire, and their mental health prior to the start of the pandemic. With both categories a  
373 higher level of stress was reported by women. The overall PSS-10 score for trial participants was  
374  $(19.3 \pm 6.9)$ . However, the average score for women was  $20.4 \pm 6.6$ , compared to an average score of  
375  $15.7 \pm 6.7$  for men. Half of participants (54%) reported that prior to COVID-19 they had generally  
376 coped well with stress. 25% reported that they had some level of stress, anxiety or depression prior  
377 to COVID-19 restrictions, but had not received a formal diagnosis and 17% reported that they had



378 previously been diagnosed with stress, anxiety or depression. Again, women were far more likely  
 379 than men to report having been diagnosed with stress, anxiety or depression prior to COVID-19  
 380 (F=19%:M14%) or have had some level of stress anxiety or depression but had not been diagnosed  
 381 (F=26%:M=20%).

382 As the pandemic caused so many enforced changes to peoples' everyday life, one of the aims  
 383 of this study was to see if any of these changes directly increased participants level of perceived stress.  
 384 As reported in the descriptive statistics, moving to working from home was the highest reported  
 385 change and was comparable for women and men. There were also notable differences between the  
 386 genders in the numbers of changes they were affected by and some key categories such as caring  
 387 from children and other dependents. A binary regression analysis was carried out which included all  
 388 lifestyle changes, and gender, age and mental health prior to COVID-19. Surprisingly, the analysis  
 389 did not show a significant link between any of the lifestyle changes and higher levels of perceived  
 390 stress. However, gender and mental health prior to COVID-19 were both significantly linked to  
 391 perceived stress during the pandemic ( $\chi^2(18, n=179) = 58.95, p < 0.001$ ). Participants who had a prior  
 392 diagnosis of stress, anxiety or depression were almost six times more likely to be in the higher stress  
 393 category ( $p=0.004, OR=5.7$ ), confirming our hypothesis, with participants who had not been officially  
 394 diagnosed, but reported some levels of stress, anxiety, or depression over three times more likely to  
 395 be in the higher stress category ( $p=0.004, OR=3.6$ ). Females were around 4 times more likely to be  
 396 in the higher stress category than males ( $p=0.014, OR=3.6$ ), which was independent of their levels of  
 397 stress prior to COVID-19. Table 6 shows the results for all coefficients of the model.

398  
 399 **Table 6. Coefficients of the predictive model for high stress (PSS score=20 or above)**  
 400

|                      |       |       |        | 95% CI |        |
|----------------------|-------|-------|--------|--------|--------|
| Variables Entered    | B     | SE    | OR     | LL     | UL     |
| Female sex (vs male) | 1.172 | .479  | 3.228* | 1.264  | 8.247  |
| Age 18-30            | 2.112 | 1.167 | 8.262  | .839   | 81.312 |
| Age 31-40            | 1.340 | 1.190 | 3.821  | .371   | 39.380 |
| Age 41-55            | .677  | 1.154 | 1.967  | .205   | 18.889 |
| Age 56-70            | .925  | 1.207 | 2.522  | .237   | 26.876 |

|                                                                       |       |       |        |       |        |
|-----------------------------------------------------------------------|-------|-------|--------|-------|--------|
| <b>Previously diagnosed with stress/anxiety or depression</b>         | 1.752 | .579  | 5.767* | 1.853 | 17.951 |
| <b>Some level of stress, anxiety or depression, but not diagnosed</b> | 1.298 | .448  | 3.663* | 1.523 | 8.812  |
| <b>Continuing to work outside the home with PPE</b>                   | .692  | .441  | 1.998  | .842  | 4.743  |
| <b>Moved to working from home</b>                                     | .289  | .404  | 1.335  | .605  | 2.946  |
| <b>Job uncertainty.</b>                                               | 1.003 | .620  | 2.728  | .808  | 9.203  |
| <b>Job loss</b>                                                       | .652  | 1.030 | 1.920  | .255  | 14.468 |
| <b>Have had COVID-19</b>                                              | -.485 | 1.077 | .616   | .075  | 5.079  |
| <b>Self-isolated due to potential COVID-19 infection</b>              | .098  | .489  | 1.103  | .423  | 2.878  |
| <b>Self-isolated due to underlying health issues</b>                  | 1.034 | .883  | 2.812  | .498  | 15.876 |
| <b>Caring for children or other dependents</b>                        | .562  | .463  | 1.754  | .708  | 4.349  |
| <b>Restriction on food due to less time to cook</b>                   | .841  | .684  | 2.320  | .607  | 8.870  |
| <b>Restriction on food due to access to food</b>                      | 1.331 | .808  | 3.784  | .777  | 18.421 |
| <b>Restriction on food due to less money</b>                          | .585  | .634  | 1.796  | .518  | 6.222  |

401 \*=p<0.05; \*\*=p<0.001. n=179. SE=standard error of B. OR= odds ratio. LL= lower limit; UL=upper  
 402 limit

403

404

## 405 Discussion

406 The aim of this study was to assess whether higher levels of perceived stress during COVID-  
 407 19 restrictions were linked to an increased likelihood of reporting weight gain, and whether increases  
 408 in food cravings and comfort eating were mediators of this effect. We also investigated whether  
 409 specific pandemic induced lifestyle changes were linked to a higher level of perceived stress and  
 410 whether levels of mental health prior to COVID-19 were linked to a greater likelihood of perceived  
 411 stress and weight gain.

412 Whilst this study was not specifically designed to investigating differences by gender, the  
 413 results from the descriptive statistics revealed notable reported differences between females and  
 414 males in several areas. Significantly higher stress levels were reported by females compared to males  
 415 both during the pandemic and in the reporting of mental health levels prior to the pandemic. As we  
 416 did not have access to PSS measurements pre-pandemic, this study is unable to say by how much  
 417 perceived stress increased during the pandemic compared to pre-COVID-19 levels.

418 This study also reported that COVID-19 restrictions had a disproportionate impact on the  
 419 everyday lives of female respondents. The higher level of working outside the home with PPE for

420 females indicates that they were more likely to work in areas in close proximity to other people, with  
421 a likely higher risk of infection. Despite the level of COVID-19 infection being higher for men,  
422 women reported higher levels of having to isolate due to potential infection, indicating that they were  
423 in environments with a higher risk of infection, either through work or possibly due to the higher  
424 level of caring for children or dependents that they reported. This is likely to have led to increased  
425 disruption and uncertainty both for work and their personal lives. Women were also more likely to be  
426 affected by a greater number of lifestyle factors, including food availability. Although these levels of  
427 changes would be expected to cause increases in perceived stress, none of the individual lifestyle  
428 changes showed a statistically significant link with higher levels of stress. It should also be considered  
429 that specific combinations of factors or the overall number of factors may have an been required to  
430 have an impact on stress. However, this study was not designed to capture that level of complexity of  
431 analysis. It is accepted that it by using categorical rather than continuous measures for perceived  
432 stress scores we may have limited the ability to track smaller changes in lifestyle factors on stress  
433 levels. Studies highlighted in the introduction reported that stress levels during COVID-19 were  
434 reported as higher in women than in men [10-12]. As in our study, categorisation of stress was based  
435 on average PSS-10 and many females were already in the higher stress category it may be that that  
436 any additional increases in stress caused by lifestyle changes could not be detected. In former work  
437 specific indicators identified as independent factors of higher levels of stress were being female,  
438 younger and having a history of anxiety or depression [10-12]. However, as the aim of this study was  
439 to investigate the relationship between higher stress and weight gain for a wide range of categories  
440 which the using categorisation of stress levels enabled us to do.

441 The other area where there was a gender imbalance was in reported weight change. Overall  
442 weight gain was more likely to be reported in females than males (F=50%: M=27%) and twice as  
443 likely to be reported in females for the highest weight gain category (F=10%: M=5%). As the average  
444 BMI values of females and males at the time of the survey were comparable, it seems unlikely that  
445 this was due to long-term trends i.e., that the BMI of female respondents was already significantly

446 higher than male respondent's pre-pandemic. It is however acknowledged that as the results are based  
447 on self-reporting, the difference in reporting between the genders may be due to a greater awareness  
448 of weight change in females and difference in body shape satisfaction between females and males  
449 [50].

450 Due the number of categories studied for eating behaviours and dietary consumption, and as  
451 the study was not specifically focused on gender differences, the remaining analysis was not split by  
452 gender. Similar to previous studies our study results show a polarisation in many of the eating  
453 behaviour and dietary consumption categories, with some strong overall trends [13-18]. The main  
454 changes in eating behaviours in this study were due to increases in food cravings and snacking during  
455 the day and evening, with over half of respondents reporting increases in these categories (52%, 53%  
456 and 52%, respectively). This is in line with levels previously reported of 42-46% increase in cravings  
457 and 53-56% increase in snacking during the pandemic [20,23,47]. This study also reported that both  
458 food cravings and snacking were linked to an increased likelihood of weight gain, with increased  
459 cravings being the driver of increased snacking.

460 For dietary consumption, similar to previous pandemic studies [15,16] a polarisation in  
461 consumption was seen for many of the food and drinks categories. One of the main changes linked to  
462 weight gain was the change in consumption of processed foods (including take aways and ready  
463 meals) and high fat/salt foods, with increases reported of 29% and 40%, respectively. However, the  
464 greatest increase was reported was for high sugar foods, where 57% of respondents reporting an  
465 increase in consumption.

466 The combination of changes in behaviours and consumption are particularly concerning as  
467 this study showed that participants who reported an increase snacking or consumption of high sugar  
468 and processed foods were 2.5-3.1 times more likely to report weight gain. This appears to be driven  
469 by underlying food cravings, as participants who reported increased food cravings were 6 times more  
470 likely to increase their snacking and processed food consumption and over 11 times more likely to  
471 increase their consumption of high sugar foods. In addition, increases in food cravings were twice as

472 likely to be reported in participants with higher levels of stress. The study highlights that food  
473 cravings and high sugar foods appear to be the main mediators of the effect of stress on weight gain.  
474 Although many previous studies have linked chronic stress to weight gain [31-34], the pandemic has  
475 given us the opportunity to observe how rapidly these behavioural pathways can be established. At  
476 the point of this study, 10 months after the initial most severe lockdowns imposed, it is apparent from  
477 our results that there was still a higher level of stress in some participants which was strongly linked  
478 to increased weight gain.

479         Limitations to this study are acknowledged. Although self-report surveys are useful to  
480 investigate overall trends, we acknowledge that they may not be a true reflection of actual behaviours  
481 and are often prone to bias, as they are based on responders' perceptions of their behaviour [51]. To  
482 minimise this, questions on impact of COVID-19 restrictions and changes in eating behaviours and  
483 dietary consumption were based on previous surveys in other populations which enabled the  
484 comparison of results across similar populations. In addition, a range of general questions for eating  
485 behaviours and dietary consumption were included (rather than just asking about behaviours of  
486 interest) to limit the focus on what might be perceived as negative behaviour. The study only asked about  
487 levels of change, rather than absolute measurements, so all measurements are based on comparable  
488 rather than quantitative levels of change. Perhaps the most important limitation of this work is that it is  
489 a correlational study, so although we are proposing that higher stress leads to weight gain, it needs to  
490 be considered that weight gain could also be the driver of stress. We acknowledge that there are  
491 complex interactions between stress and weight gain, with different responses shown in females and  
492 males [52]. However, we proposed that by focusing on the role of food cravings this provides a  
493 stronger indication that the main direction of influence is stress, which drives food cravings, which  
494 in turn causes weight gain.

495

496

## 497 **Conclusions**

498 In summary, the results from this study corroborate previous research, that higher levels of  
499 stress are significantly linked to increased weight gain. The study also highlights significant  
500 differences in perceived stress and weight gain during the pandemic by gender and the role in mental  
501 health prior to the pandemic in weight gain. Further work is necessary to understand how stress  
502 reduction strategies could be incorporated into weight loss/maintenance approaches, including a  
503 greater awareness of individuals' stress levels and history of mental health when developing weight  
504 loss and maintenance strategies. A more gendered approach to weight loss may also be required,  
505 either to take into consideration differences in perceived stress levels between females and males or  
506 to determine if the role of stress in weight gain is a gendered factor.

507 The study also reiterates the key role of food cravings in the link between stress and weight  
508 gain. Food cravings were linked to a 3 times increased likelihood of reporting weight gain, and to 6-  
509 11 times increased likelihood of snacking and consumption of high sugar and-processed foods. This  
510 strongly suggests that re-focusing weight loss methods on the ability to control cravings, possibly by  
511 using stress reduction techniques, will be a more effective approach to than the current focus on  
512 reduction of the downstream behaviours of increased snacking, and consumption of processed and  
513 high sugar foods.

514

## 515 **Acknowledgements**

516 The authors thank staff of the School of Human and Behavioural Sciences, College of Human  
517 Sciences, Bangor University, UK for their support and participants for taking part in the study.

518

519

520

## 521 **References**

- 522 1. Cucinotta D, Vanelli M. WHO Declares COVID-19 a Pandemic. *Acta Biomed* [Internet].  
523 2020 Mar. 19 [cited 2022 Nov. 2];91(1):157-60. Available from:  
524 <https://www.mattioli1885journals.com/index.php/actabiomedica/article/view/9397>
- 525 2. *Our World in Data*, Global Change Data Lab, Oxford University, 2021. Cited 2021 June 20.  
526 Available from: [Policy Responses to the Coronavirus Pandemic - Statistics and Research -](#)  
527 [Our World in Data](#)
- 528 3. *Institute for Government*, 2021. Cited 2021 June 25. Available from: [timeline-lockdown-](#)  
529 [social \(instituteforgovernment.org.uk\)](#)
- 530 4. *Institute for Government*, 2021. Cited 2021 June 25. Available from: [Coronavirus lockdown](#)  
531 [rules in each part of the UK | The Institute for Government](#)
- 532 5. *Office of National Statistics (ONS)*, 2021. Deaths registered weekly in England and Wales.  
533 Cited 2021, June 27. Available from:  
534 [https://www.ons.gov.uk/peoplepopulationandcommunity/birthsdeathsandmarriages/deaths/d](https://www.ons.gov.uk/peoplepopulationandcommunity/birthsdeathsandmarriages/deaths/datasets/weeklyprovisionalfiguresondeathsregisteredinenglandandwales)  
535 [atasets/weeklyprovisionalfiguresondeathsregisteredinenglandandwales](https://www.ons.gov.uk/peoplepopulationandcommunity/birthsdeathsandmarriages/deaths/datasets/weeklyprovisionalfiguresondeathsregisteredinenglandandwales)
- 536 6. Shevlin M, McBride O, Murphy J, Gibson Miller J, Hartman TK, Levita L, et al. Anxiety,  
537 depression, traumatic stress, and COVID-19 related anxiety in the UK general population  
538 during the COVID-19 pandemic [Internet]. *PsyArXiv*. 2020. Available from:  
539 <http://dx.doi.org/10.31234/osf.io/hb6nq>
- 540 7. *Office of National Statistics (ONS)* 2021. Claimant count and vacancies time series. Cited  
541 2021 June 26. Available from:  
542 [https://www.ons.gov.uk/employmentandlabourmarket/peoplenotinwork/outofworkbenefits/ti](https://www.ons.gov.uk/employmentandlabourmarket/peoplenotinwork/outofworkbenefits/timeseries/bcjd/unem)  
543 [meseries/bcjd/unem](https://www.ons.gov.uk/employmentandlabourmarket/peoplenotinwork/outofworkbenefits/timeseries/bcjd/unem)
- 544 8. Daly M, Sutin AR, Robinson E. Longitudinal changes in mental health and the COVID-19  
545 pandemic: evidence from the UK Household Longitudinal Study. *Psychol Med* [Internet].  
546 2020;1–10. Available from: <http://dx.doi.org/10.1017/S0033291720004432>



- 547 9. Rossi R, Socci V, Talevi D, Mensi S, Niolu C, Pacitti F, et al. COVID-19 pandemic and  
548 lockdown measures impact on mental health among the general population in Italy. *Front*  
549 *Psychiatry* [Internet]. 2020;11:790. Available from:  
550 <http://dx.doi.org/10.3389/fpsyt.2020.00790>
- 551 10. Pieh C, Budimir S, Probst T. The effect of age, gender, income, work, and physical activity  
552 on mental health during coronavirus disease (COVID-19) lockdown in Austria. *J Psychosom*  
553 *Res* [Internet]. 2020;136(110186):110186. Available from:  
554 <http://dx.doi.org/10.1016/j.jpsychores.2020.110186>
- 555 11. Adamson MM, Phillips A, Seenivasan S, Martinez J, Grewal H, Kang X, et al. International  
556 prevalence and correlates of psychological stress during the global COVID-19 pandemic. *Int*  
557 *J Environ Res Public Health* [Internet]. 2020;17(24):9248. Available from:  
558 <http://dx.doi.org/10.3390/ijerph17249248>
- 559 12. Robillard R, Saad M, Edwards J, Solomonova E, Pennestri M-H, Daros A, et al. Social,  
560 financial and psychological stress during an emerging pandemic: observations from a  
561 population survey in the acute phase of COVID-19. *BMJ Open* [Internet].  
562 2020;10(12):e043805. Available from: <http://dx.doi.org/10.1136/bmjopen-2020-043805>
- 563 13. Bakaloudi DR, Barazzoni R, Bischoff SC, Breda J, Wickramasinghe K, Chourdakis M.  
564 Impact of the first COVID-19 lockdown on body weight: A combined systematic review and  
565 a meta-analysis. *Clin Nutr* [Internet]. 2021; Available from:  
566 <http://dx.doi.org/10.1016/j.clnu.2021.04.015>
- 567 14. Ammar A, Brach M, Trabelsi K, Chtourou H, Boukhris O, Masmoudi L, et al. Effects of  
568 COVID-19 home confinement on eating behaviour and physical activity: Results of the  
569 ECLB-COVID19 international online survey. *Nutrients* [Internet]. 2020;12(6):1583.  
570 Available from: <http://dx.doi.org/10.3390/nu12061583>



- 571 15. Di Renzo L, Gualtieri P, Pivari F, Soldati L, Attinà A, Cinelli G, et al. Eating habits and  
572 lifestyle changes during COVID-19 lockdown: an Italian survey. *J Transl Med* [Internet].  
573 2020;18(1):229. Available from: <http://dx.doi.org/10.1186/s12967-020-02399-5>
- 574 16. Sidor A, Rzymiski P. Dietary Choices and Habits during COVID-19 Lockdown: Experience  
575 from Poland. *Nutrients* [Internet]. 2020;12(6):1657. Available from:  
576 <http://dx.doi.org/10.3390/nu12061657>
- 577 17. Zachary Z, Brianna F, Brianna L, Garrett P, Jade W, Alyssa D, Mikayla K. Self-quarantine  
578 and weight gain related risk factors during the COVID-19 pandemic. *Obesity research &*  
579 *clinical practice*. 2020 May 1;14(3):210-6. Available from:  
580 <https://doi.org/10.1016/j.orcp.2020.05.004>
- 581 18. Flanagan EW, Beyl RA, Fearnbach SN, Altazan AD, Martin CK, Redman LM. The impact  
582 of COVID-19 stay-at-home orders on health behaviors in adults. *Obesity (Silver Spring)*  
583 [Internet]. 2021;29(2):438–45. Available from: <http://dx.doi.org/10.1002/oby.23066>
- 584 19. Bhutani S, vanDellen MR, Cooper JA. Longitudinal weight gain and related risk behaviors  
585 during the COVID-19 pandemic in adults in the US. *Nutrients* [Internet]. 2021;13(2):671.  
586 Available from: <http://dx.doi.org/10.3390/nu13020671>
- 587 20. Buckland NJ, Swinnerton LF, Ng K, Price M, Wilkinson LL, Myers A, et al. Susceptibility to  
588 increased high energy dense sweet and savoury food intake in response to the COVID-19  
589 lockdown: The role of craving control and acceptance coping strategies. *Appetite* [Internet].  
590 2021;158(105017):105017. Available from: <http://dx.doi.org/10.1016/j.appet.2020.105017>
- 591 21. Rolland B, Haesebaert F, Zante E, Benyamina A, Haesebaert J, Franck N. Global changes and  
592 factors of increase in caloric/salty food intake, screen use, and substance use during the early  
593 COVID-19 containment phase in the general population in France: Survey study. *JMIR Public*  
594 *Health Surveill* [Internet]. 2020;6(3):e19630. Available from:  
595 <http://dx.doi.org/10.2196/19630>

- 596 22. Scarmozzino F, Visioli F. Covid-19 and the subsequent lockdown modified dietary habits of  
597 almost half the population in an Italian sample. *Foods* [Internet]. 2020;9(5):675. Available  
598 from: <http://dx.doi.org/10.3390/foods9050675>
- 599 23. Buckland NJ, Kemp E. Low craving control predicts increased high energy density food  
600 intake during the COVID-19 lockdown: Result replicated in an Australian sample. *Appetite*  
601 [Internet]. 2021;166(105317):105317. Available from:  
602 <http://dx.doi.org/10.1016/j.appet.2021.105317>
- 603 24. Jaacks LM, Vandevijvere S, Pan A, McGowan CJ, Wallace C, Imamura F, et al. The obesity  
604 transition: stages of the global epidemic. *Lancet Diabetes Endocrinol* [Internet].  
605 2019;7(3):231–40. Available from: [http://dx.doi.org/10.1016/S2213-8587\(19\)30026-9](http://dx.doi.org/10.1016/S2213-8587(19)30026-9)
- 606 25. Di Cesare M, Sorić M, Bovet P, Miranda JJ, Bhutta Z, Stevens GA, et al. The epidemiological  
607 burden of obesity in childhood: a worldwide epidemic requiring urgent action. *BMC Med*  
608 [Internet]. 2019;17(1):212. Available from: <http://dx.doi.org/10.1186/s12916-019-1449-8>
- 609 26. Sanchis-Gomar F, Lavie CJ, Mehra MR, Henry BM, Lippi G. Obesity and outcomes in  
610 COVID-19: When an epidemic and pandemic collide. *Mayo Clin Proc* [Internet].  
611 2020;95(7):1445–53. Available from: <http://dx.doi.org/10.1016/j.mayocp.2020.05.006>
- 612 27. Hussain A, Mahawar K, Xia Z, Yang W, El-Hasani S. Obesity and mortality of COVID-19.  
613 Meta-analysis. *Obes Res Clin Pract* [Internet]. 2020;14(4):295–300. Available from:  
614 <http://dx.doi.org/10.1016/j.orcp.2020.07.002>
- 615 28. Yang J, Hu J, Zhu C. Obesity aggravates COVID-19: A systematic review and meta-analysis.  
616 *J Med Virol* [Internet]. 2021;93(1):257–61. Available from:  
617 <http://dx.doi.org/10.1002/jmv.26237>
- 618 29. Chooi YC, Ding C, Magkos F. The epidemiology of obesity. *Metabolism* [Internet].  
619 2019;92:6–10. Available from: <http://dx.doi.org/10.1016/j.metabol.2018.09.005>
- 620 30. Levine S, Ursin H, Kobo GF, Riviera C. Stress: neurobiology and neuroendocrinology. New  
621 York (NY: Marcel Dekker; 1991).

- 622 31. Aschbacher K, Kornfeld S, Picard M, Puterman E, Havel PJ, Stanhope K, et al. Chronic stress  
623 increases vulnerability to diet-related abdominal fat, oxidative stress, and metabolic risk.  
624 Psychoneuroendocrinology [Internet]. 2014;46:14–22. Available from:  
625 <http://dx.doi.org/10.1016/j.psyneuen.2014.04.003>
- 626 32. Geiker NRW, Astrup A, Hjorth MF, Sjödin A, Pijls L, Markus CR. Does stress influence  
627 sleep patterns, food intake, weight gain, abdominal obesity and weight loss interventions and  
628 vice versa?: Effect of stress on food intake. *Obes Rev* [Internet]. 2018;19(1):81–97. Available  
629 from: <http://dx.doi.org/10.1111/obr.12603>
- 630 33. Dallman MF, Pecoraro N, Akana SF, la Fleur SE, Gomez F, Houshyar H, et al. Chronic stress  
631 and obesity: A new view of “comfort food.” *Proc Natl Acad Sci U S A* [Internet].  
632 2003;100(20):11696–701. Available from: <http://dx.doi.org/10.1073/pnas.1934666100>
- 633 34. Torres SJ, Nowson CA. Relationship between stress, eating behavior, and obesity. *Nutrition*  
634 [Internet]. 2007;23(11–12):887–94. Available from:  
635 <http://dx.doi.org/10.1016/j.nut.2007.08.008>
- 636 35. Cherikh F, Frey S, Bel C, Attanasi G, Alifano M, Iannelli A. Behavioral food addiction during  
637 lockdown: Time for awareness, time to prepare the aftermath. *Obes Surg* [Internet].  
638 2020;30(9):3585–7. Available from: <http://dx.doi.org/10.1007/s11695-020-04649-3>
- 639 36. Cummings JR, Ackerman JM, Wolfson JA, Gearhardt AN. COVID-19 stress and eating and  
640 drinking behaviors in the United States during the early stages of the pandemic. *Appetite*  
641 [Internet]. 2021;162(105163):105163. Available from:  
642 <http://dx.doi.org/10.1016/j.appet.2021.105163>
- 643 37. Hill AJ. The psychology of food craving: Symposium on ‘Molecular mechanisms and  
644 psychology of food intake.’ *Proc Nutr Soc* [Internet]. 2007;66(2):277–85. Available from:  
645 <http://dx.doi.org/10.1017/s0029665107005502>

- 646 38. Chao A, Grilo CM, White MA, Sinha R. Food cravings, food intake, and weight status in a  
647 community-based sample. *Eat Behav* [Internet]. 2014;15(3):478–82. Available from:  
648 <http://dx.doi.org/10.1016/j.eatbeh.2014.06.003>
- 649 39. Smithson EF, Hill AJ. It is not how much you crave but what you do with it that counts:  
650 behavioural responses to food craving during weight management. *Eur J Clin Nutr* [Internet].  
651 2017;71(5):625–30. Available from: <http://dx.doi.org/10.1038/ejcn.2016.235>
- 652 40. Chao AM, Grilo CM, Sinha R. Food cravings, binge eating, and eating disorder  
653 psychopathology: Exploring the moderating roles of gender and race. *Eat Behav* [Internet].  
654 2016;21:41–7. Available from: <http://dx.doi.org/10.1016/j.eatbeh.2015.12.007>
- 655 41. Adam TC, Epel ES. Stress, eating and the reward system. *Physiol Behav* [Internet].  
656 2007;91(4):449–58. Available from: <http://dx.doi.org/10.1016/j.physbeh.2007.04.011>
- 657 42. Burton P, J. Smit H, J. Lightowler H. The influence of restrained and external eating patterns  
658 on overeating. *Appetite* [Internet]. 2007;49(1):191–7. Available from:  
659 <http://dx.doi.org/10.1016/j.appet.2007.01.007>
- 660 43. Romieu I, On behalf of the IARC working group on Energy Balance and Obesity, Dossus L,  
661 Barquera S, Blotière HM, Franks PW, et al. Energy balance and obesity: what are the main  
662 drivers? *Cancer Causes Control* [Internet]. 2017;28(3):247–58. Available from:  
663 <http://dx.doi.org/10.1007/s10552-017-0869-z>
- 664 44. Fischer M, Oberänder N, Weimann A. Four main barriers to weight loss maintenance? A  
665 quantitative analysis of difficulties experienced by obese patients after successful weight  
666 reduction. *Eur J Clin Nutr* [Internet]. 2020;74(8):1192–200. Available from:  
667 <http://dx.doi.org/10.1038/s41430-020-0559-x>
- 668 45. Burgess E, Hassmén P, Pumpa KL. Determinants of adherence to lifestyle intervention in  
669 adults with obesity: a systematic review: Adherence to lifestyle intervention in obesity. *Clin*  
670 *Obes* [Internet]. 2017;7(3):123–35. Available from: <http://dx.doi.org/10.1111/cob.12183>

- 671 46. Özer ZY, Özcan S, Seydaoğlu G, Kurdak H. Barriers to losing weight for women attending  
672 group visits in primary care: A qualitative exploration using in-depth interviews. Eur J Gen  
673 Pract [Internet]. 2021;27(1):331–8. Available from:  
674 <http://dx.doi.org/10.1080/13814788.2021.1998446>
- 675 47. Robinson E, Boyland E, Chisholm A, Harrold J, Maloney NG, Marty L, et al. Obesity, eating  
676 behavior and physical activity during COVID-19 lockdown: A study of UK adults. Appetite  
677 [Internet]. 2021;156(104853):104853. Available from:  
678 <http://dx.doi.org/10.1016/j.appet.2020.104853>
- 679 48. Cohen S, Kamarck T, Mermelstein R. A global measure of perceived stress. J Health Soc  
680 Behav [Internet]. 1983;24(4):385–96. Available from: <http://dx.doi.org/10.2307/2136404>
- 681 49. Cena H, Fiechtner L, Vincenti A, Magenes VC, De Giuseppe R, Manuelli M, et al. COVID-  
682 19 pandemic as risk factors for excessive weight gain in pediatrics: The role of changes in  
683 nutrition behavior. A narrative review. Nutrients [Internet]. 2021;13(12):4255. Available  
684 from: <http://dx.doi.org/10.3390/nu13124255>
- 685 50. Pingitore R, Spring B, Garfield D. Gender Differences in Body Satisfaction. Obesity  
686 Research. 1997;5(5).
- 687 51. Demetriou C, Ozer BU, Essau CA. Self-Report Questionnaires. In: The Encyclopedia of  
688 Clinical Psychology. Hoboken, NJ, USA: John Wiley & Sons, Inc.; 2015. p. 1–6.
- 689 52. Anversa RG, Muthmainah M, Sketriene D, Gogos A, Sumithran P, Brown RM. A review of sex  
690 differences in the mechanisms and drivers of overeating. Front Neuroendocrinol [Internet].  
691 2021;63(100941):100941. Available from: <http://dx.doi.org/10.1016/j.yfrne.2021.100941>
- 692  
693  
694  
695  
696

697 **Supporting Information**

698 S1 Table

699 **Descriptive statistics: demographics, reported changes due to COVID-19 and levels of stress**

700 S2 Table

701 **Reported Changes in Dietary Behaviours, Dietary Consumption and Physical Activity**

702

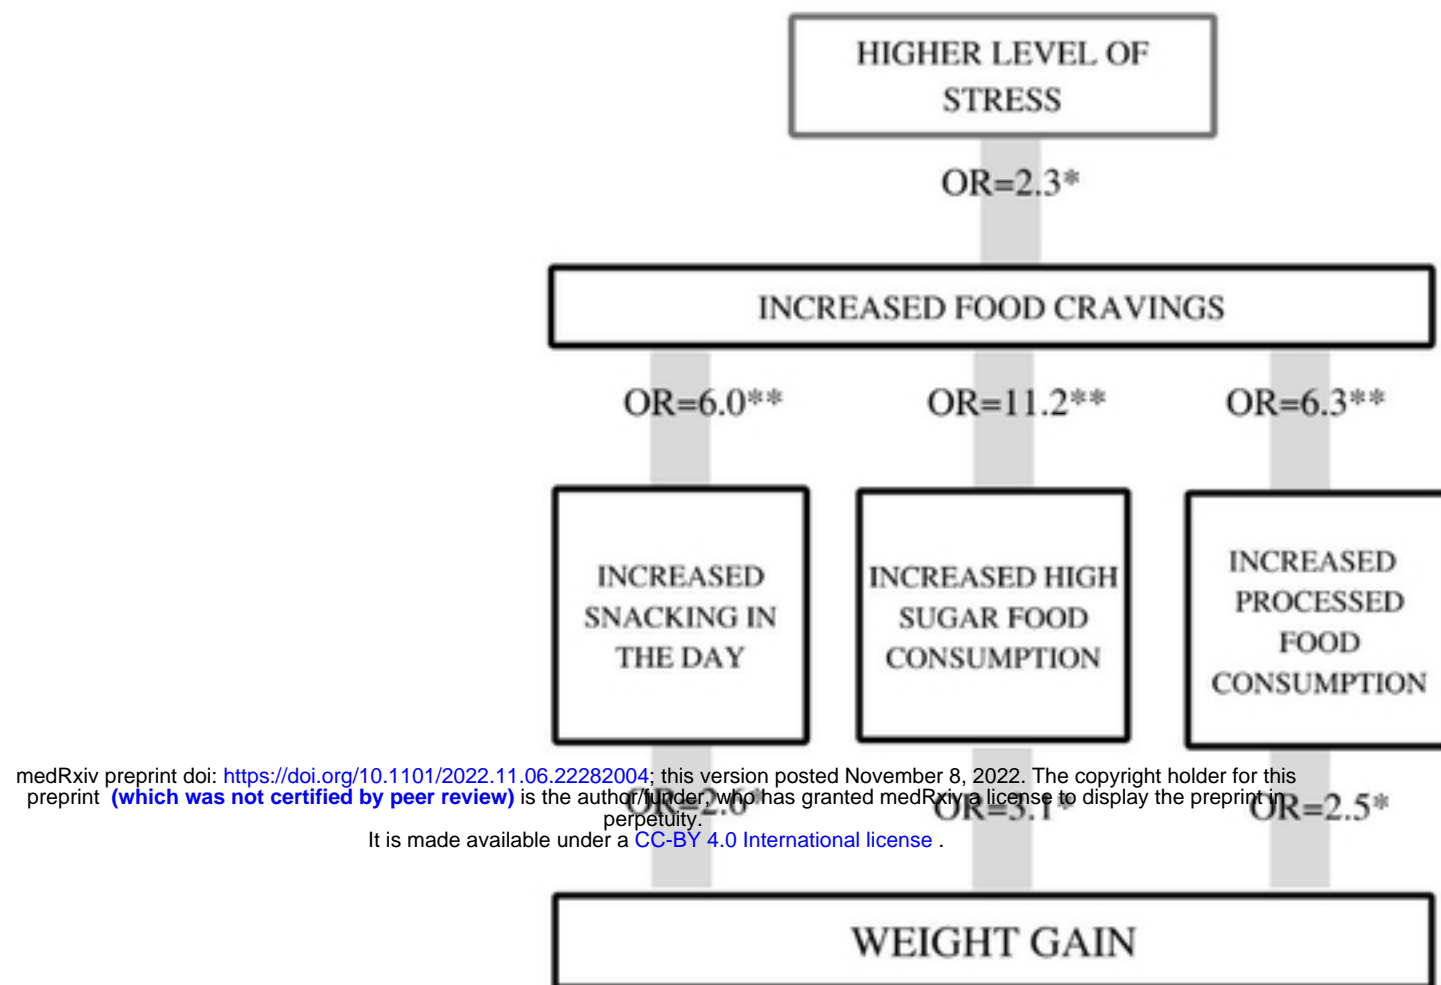

medRxiv preprint doi: <https://doi.org/10.1101/2022.11.06.22282004>; this version posted November 8, 2022. The copyright holder for this preprint (which was not certified by peer review) is the author/funder, who has granted medRxiv a license to display the preprint in perpetuity. It is made available under a [CC-BY 4.0 International license](https://creativecommons.org/licenses/by/4.0/).

**Figure 1 Summary of the key statistical analyses from the study**

\*=p<0.05; \*\*=p<0.001. n=179. OR= odds ratio.
